# Supplementary material for: Inverse modeling of the 2021 spring super dust storms in East Asia
Source: Copernicus journal article supplement (doi:10.5194/acp-2021-1062), 2022-01-13
Supplement: Supplementary file 1 [file acp-2021-1062-supplement.pdf]

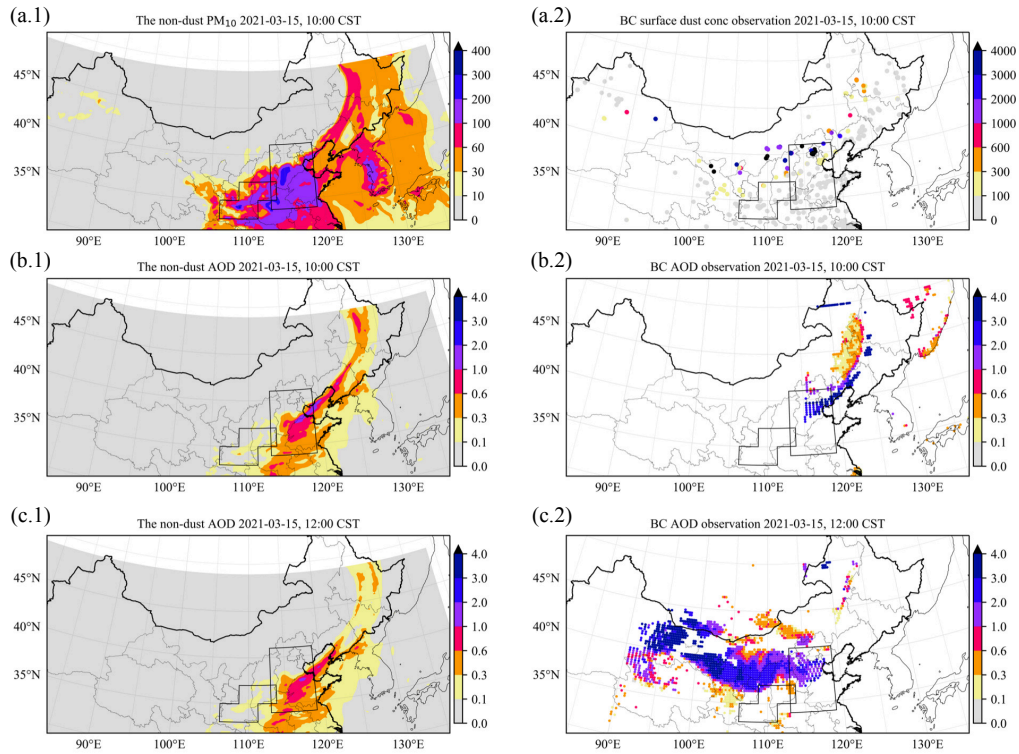

**Figure S1.** Snapshots of non-dust aerosol simulation and the bias-corrected observations during severe dust event 1 (SD1) at March 15. Row (a) shows the non-dust PM<sub>10</sub> simulation (column 1) simulated by LOTOS-EUROS and bias-corrected dust surface concentration (column 2) at 10:00 CST. Similar, row (b-c) show the non-dust AOD simulation (column 1) and bias-corrected dust AOD (column 2) at 10:00 (b) and 12:00 (c).

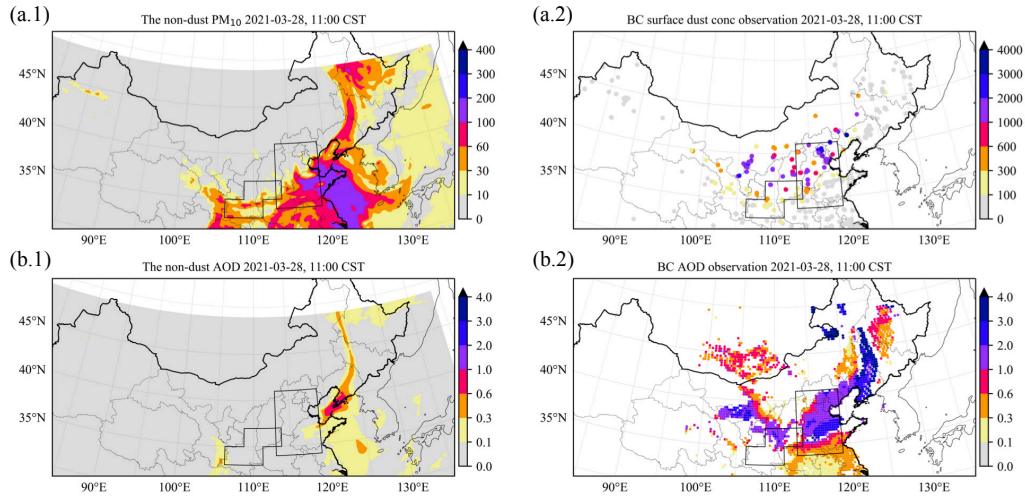

**Figure S2.** Snapshots of non-dust aerosol simulation and the bias-corrected observations during severe dust event 2 (SD2) at March 28. Row (a) shows the non-dust  $PM_{10}$  simulation (column 1) simulated by LOTOS-EUROS and bias-corrected dust surface concentration (column 2) at 11:00 CST. Similar, row (b) show the non-dust AOD simulation (column 1) and bias-corrected dust AOD (column 2) at 11:00.

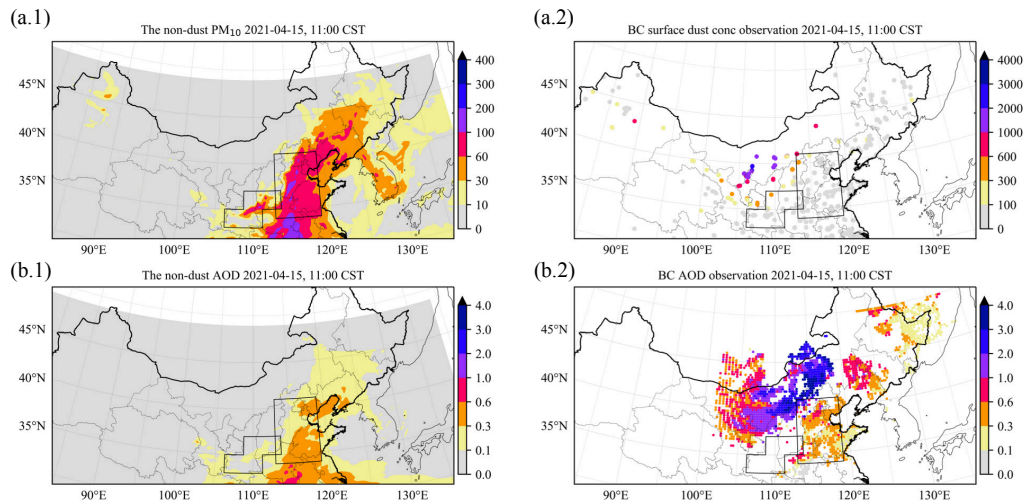

**Figure S3.** Snapshots of non-dust aerosol simulation and the bias-corrected observations during severe dust event 3 (SD3) at April 15. Row (a) shows the non-dust  $PM_{10}$  simulation (column 1) simulated by LOTOS-EUROS and bias-corrected dust surface concentration (column 2) at 11:00 CST. Similar, row (b) show the non-dust AOD simulation (column 1) and bias-corrected dust AOD (column 2) at 11:00.
